# Supplementary material
Source: publisher figshare collection journal article supplement (https://acs.figshare.com/ndownloader/files/4769308)
Supplement: Supplementary file 1 [file 4769308]

data_publication_text
_publ_requested_journal          'JACS'
_publ_contact_author_name        'Randolf Dag K\"ohn'
_publ_contact_author_address     
;Department of Chemistry
University of Bath
Bath, BA2 7AY
United Kingdom
;
_publ_contact_author_email       'r.d.kohn@bath.ac.uk'
_publ_contact_author_phone       '# 44 1225 38 3305'
_publ_contact_author_fax         '# 44 1225 82 6231'
_publ_requested_coeditor_name     

;
 Matthias Haufe, Gabriele Kociok-K\"ohn
;

_publ_section_title
;
 Observation of Intramolecular Paramagnetic T1 Spin Decoupling 
 in the 13C NMR Spectra of Triazacyclohexane Complexes of Ni(II)
;

loop_
 _publ_author_name
 _publ_author_address
       'Randolf Dag K\"ohn'
;       University of Bath
        Department of Chemistry
        Bath, BA2 7AY 
        United Kingdom
;
       'Matthias Haufe'
;       Continental AG Hannover
        Dept. 61021 CTT TC
        Jaedekamp 30,
        D-30419 Hannover, 
        Germany
;
       'Gabriele Kociok-K\"ohn'
;       University of Bath
        Department of Chemistry
        Bath, BA2 7AY 
        United Kingdom
;

#============================================================================== 
  
data_h06rdk1
 
_audit_creation_method            SHELXL-97
_chemical_name_systematic
;
 ?
;
_chemical_name_common             ?
_chemical_melting_point           ?
_chemical_formula_moiety          
'C30 H36 N6 Ni 1+, B2 F8 1-'
_chemical_formula_sum
 'C30 H36 B2 F8 N6 Ni'
_chemical_formula_weight          712.98
 
loop_
 _atom_type_symbol
 _atom_type_description
 _atom_type_scat_dispersion_real
 _atom_type_scat_dispersion_imag
 _atom_type_scat_source
 'C'  'C'   0.0033   0.0016
 'International Tables Vol C Tables 4.2.6.8 and 6.1.1.4'
 'H'  'H'   0.0000   0.0000
 'International Tables Vol C Tables 4.2.6.8 and 6.1.1.4'
 'N'  'N'   0.0061   0.0033
 'International Tables Vol C Tables 4.2.6.8 and 6.1.1.4'
 'B'  'B'   0.0013   0.0007
 'International Tables Vol C Tables 4.2.6.8 and 6.1.1.4'
 'F'  'F'   0.0171   0.0103
 'International Tables Vol C Tables 4.2.6.8 and 6.1.1.4'
 'Ni'  'Ni'   0.3393   1.1124
 'International Tables Vol C Tables 4.2.6.8 and 6.1.1.4'
 
_symmetry_cell_setting            triclinic
_symmetry_space_group_name_H-M    'P -1'
 
loop_
 _symmetry_equiv_pos_as_xyz
 'x, y, z'
 '-x, -y, -z'
 
_cell_length_a                    10.9500(2)
_cell_length_b                    10.9920(2)
_cell_length_c                    16.3930(4)
_cell_angle_alpha                 71.5000(10)
_cell_angle_beta                  71.1650(10)
_cell_angle_gamma                 71.6250(10)
_cell_volume                      1720.45(6)
_cell_formula_units_Z             2
_cell_measurement_temperature     150(2)
_cell_measurement_reflns_used     37097
_cell_measurement_theta_min        2.910
_cell_measurement_theta_max        29.575
 
_exptl_crystal_description        'square plate'
_exptl_crystal_colour             'intense blue'
_exptl_crystal_size_max           0.45
_exptl_crystal_size_mid           0.38
_exptl_crystal_size_min           0.15
_exptl_crystal_density_meas       ?
_exptl_crystal_density_diffrn     1.376
_exptl_crystal_density_method     'not measured'
_exptl_crystal_F_000              736
_exptl_absorpt_coefficient_mu     0.637
_exptl_absorpt_correction_type    none
 
_exptl_special_details
;
 ?
;
 
_diffrn_ambient_temperature       150(2)
_diffrn_radiation_wavelength      0.71073
_diffrn_radiation_type            MoK\a
_diffrn_radiation_source          'fine-focus sealed tube'
_diffrn_radiation_monochromator   graphite
_diffrn_measurement_device_type   'Nonius Kappa CCD'
_diffrn_measurement_method        '228 1.9 degree images with \w scans' 
_diffrn_standards_number          0
_diffrn_standards_decay_%         -0
_diffrn_reflns_number             33304
_diffrn_reflns_av_R_equivalents   0.0564
_diffrn_reflns_av_sigmaI/netI     0.0547
_diffrn_reflns_limit_h_min        -14
_diffrn_reflns_limit_h_max        15
_diffrn_reflns_limit_k_min        -15
_diffrn_reflns_limit_k_max        13
_diffrn_reflns_limit_l_min        -22
_diffrn_reflns_limit_l_max        22
_diffrn_reflns_theta_min          3.83
_diffrn_reflns_theta_max          29.60
_reflns_number_total              9592
_reflns_number_gt                 7066
_reflns_threshold_expression      >2sigma(I)
 
_computing_data_collection        
'Collect, Nonius program suite version 1.9 (1997)'
_computing_cell_refinement        
'Collect, Nonius program suite version 1.9 (1997)'
_computing_data_reduction         
'Denzo and Scalepack (Otwinowski & Minor, 1997)'
_computing_structure_solution     
; 
 SIR97- Altomare A., Burla M.C., Camalli M., Cascarano G.L., Giacovazzo C. , 
 Guagliardi A., Moliterni A.G.G., Polidori G.,Spagna R. 
 (1999) J. Appl. Cryst. 32, 115-119.
;

_computing_structure_refinement   
;
 SHELX97-2 Program for Crystal Structure Analysis. G. M. Sheldrick,
 Institut f. Anorg. Chemie der Universit\"at, Tammanstrasse 4, 
 D-3400 G\"ottingen, Germany, 1998.
;

_computing_molecular_graphics     
'ORTEP3 for Windows - L. J. Farrugia, J. Appl. Crystallogr. 1997, 30, 565'
_computing_publication_material   'SHELX97-2, G. M. Sheldrick' 
 
_refine_special_details
;
 Refinement of F^2^ against ALL reflections.  The weighted R-factor wR and
 goodness of fit S are based on F^2^, conventional R-factors R are based
 on F, with F set to zero for negative F^2^. The threshold expression of
 F^2^ > 2sigma(F^2^) is used only for calculating R-factors(gt) etc. and is
 not relevant to the choice of reflections for refinement.  R-factors based
 on F^2^ are statistically about twice as large as those based on F, and R-
 factors based on ALL data will be even larger.
;
 
_refine_ls_structure_factor_coef  Fsqd
_refine_ls_matrix_type            full
_refine_ls_weighting_scheme       calc
_refine_ls_weighting_details
 'calc w=1/[\s^2^(Fo^2^)+(0.0503P)^2^+0.4527P] where P=(Fo^2^+2Fc^2^)/3'
_atom_sites_solution_primary      direct
_atom_sites_solution_secondary    difmap
_atom_sites_solution_hydrogens    geom
_refine_ls_hydrogen_treatment     noref
_refine_ls_extinction_method      none
_refine_ls_extinction_coef        ?
_refine_ls_number_reflns          9592
_refine_ls_number_parameters      518
_refine_ls_number_restraints      0
_refine_ls_R_factor_all           0.0695
_refine_ls_R_factor_gt            0.0433
_refine_ls_wR_factor_ref          0.1107
_refine_ls_wR_factor_gt           0.0998
_refine_ls_goodness_of_fit_ref    1.023
_refine_ls_restrained_S_all       1.023
_refine_ls_shift/su_max           0.001
_refine_ls_shift/su_mean          0.000
 
loop_
 _atom_site_label
 _atom_site_type_symbol
 _atom_site_fract_x
 _atom_site_fract_y
 _atom_site_fract_z
 _atom_site_U_iso_or_equiv
 _atom_site_adp_type
 _atom_site_occupancy
 _atom_site_symmetry_multiplicity
 _atom_site_calc_flag
 _atom_site_refinement_flags
 _atom_site_disorder_assembly
 _atom_site_disorder_group
Ni Ni 0.66817(2) -0.12121(2) 0.260553(14) 0.02696(7) Uani 1 1 d . . .
C1 C 0.49446(16) -0.10741(16) 0.17652(11) 0.0265(3) Uani 1 1 d . . .
H1A H 0.4026 -0.0684 0.1696 0.032 Uiso 1 1 calc R . .
H1B H 0.5421 -0.1665 0.1356 0.032 Uiso 1 1 calc R . .
N1 N 0.49506(13) -0.17897(13) 0.26916(9) 0.0254(3) Uani 1 1 d . . .
C11 C 0.46869(17) -0.31184(17) 0.29504(12) 0.0300(4) Uani 1 1 d . . .
H11A H 0.4712 -0.3522 0.3579 0.036 Uiso 1 1 calc R . .
H11B H 0.5401 -0.3680 0.2585 0.036 Uiso 1 1 calc R . .
C12 C 0.33594(18) -0.30970(17) 0.28390(12) 0.0310(4) Uani 1 1 d . . .
C13 C 0.21885(18) -0.27386(18) 0.34570(13) 0.0358(4) Uani 1 1 d . . .
H13 H 0.2221 -0.2542 0.3972 0.043 Uiso 1 1 calc R . .
C14 C 0.0974(2) -0.2664(2) 0.33340(17) 0.0511(5) Uani 1 1 d . . .
H14 H 0.0181 -0.2426 0.3767 0.061 Uiso 1 1 calc R . .
C15 C 0.0913(3) -0.2928(3) 0.25964(19) 0.0683(8) Uani 1 1 d . . .
H15 H 0.0075 -0.2860 0.2508 0.082 Uiso 1 1 calc R . .
C16 C 0.2062(3) -0.3295(4) 0.19739(18) 0.0765(9) Uani 1 1 d . . .
H16 H 0.2018 -0.3489 0.1461 0.092 Uiso 1 1 calc R . .
C17 C 0.3287(2) -0.3380(3) 0.20987(15) 0.0550(6) Uani 1 1 d . . .
H17 H 0.4079 -0.3635 0.1670 0.066 Uiso 1 1 calc R . .
C2 C 0.41145(16) -0.09270(17) 0.32925(11) 0.0280(3) Uani 1 1 d . . .
H2A H 0.3219 -0.0539 0.3181 0.034 Uiso 1 1 calc R . .
H2B H 0.4027 -0.1418 0.3922 0.034 Uiso 1 1 calc R . .
N2 N 0.48475(14) 0.00996(14) 0.30670(9) 0.0270(3) Uani 1 1 d . B .
C21 C 0.44136(18) 0.08848(19) 0.37450(12) 0.0338(4) Uani 1 1 d . . .
H21A H 0.4983 0.1515 0.3568 0.041 Uiso 1 1 calc R A 1
H21B H 0.4542 0.0282 0.4321 0.041 Uiso 1 1 calc R A 1
C22 C 0.2906(19) 0.168(2) 0.3870(16) 0.025(2) Uani 0.50 1 d P B 1
C23 C 0.1967(16) 0.1106(13) 0.4428(7) 0.0421(19) Uani 0.50 1 d P B 1
H23 H 0.2198 0.0259 0.4807 0.051 Uiso 0.50 1 calc PR B 1
C24 C 0.0592(13) 0.1755(13) 0.4468(9) 0.057(3) Uani 0.50 1 d P B 1
H24 H -0.0098 0.1360 0.4875 0.068 Uiso 0.50 1 calc PR B 1
C25 C 0.0318(16) 0.2950(16) 0.3904(8) 0.057(3) Uani 0.50 1 d P B 1
H25 H -0.0580 0.3403 0.3912 0.068 Uiso 0.50 1 calc PR B 1
C26 C 0.1323(18) 0.3518(13) 0.3319(11) 0.057(3) Uani 0.50 1 d P B 1
H26 H 0.1106 0.4370 0.2942 0.069 Uiso 0.50 1 calc PR B 1
C27 C 0.2644(12) 0.2874(12) 0.3268(9) 0.0351(18) Uani 0.50 1 d P B 1
H27 H 0.3339 0.3237 0.2838 0.042 Uiso 0.50 1 calc PR B 1
C22A C 0.304(2) 0.143(2) 0.393(2) 0.037(4) Uani 0.50 1 d P B 2
C23A C 0.2092(15) 0.0841(12) 0.4669(7) 0.043(2) Uani 0.50 1 d P B 2
H23A H 0.2406 0.0067 0.5084 0.052 Uiso 0.50 1 calc PR B 2
C24A C 0.0773(14) 0.1360(15) 0.4789(9) 0.069(3) Uani 0.50 1 d P B 2
H24A H 0.0192 0.0911 0.5274 0.083 Uiso 0.50 1 calc PR B 2
C25A C 0.0229(19) 0.2490(17) 0.4256(11) 0.077(6) Uani 0.50 1 d P B 2
H25A H -0.0707 0.2820 0.4371 0.092 Uiso 0.50 1 calc PR B 2
C26A C 0.1048(16) 0.3145(15) 0.3550(10) 0.068(4) Uani 0.50 1 d P B 2
H26A H 0.0695 0.3919 0.3152 0.081 Uiso 0.50 1 calc PR B 2
C27A C 0.2413(16) 0.2646(16) 0.3431(10) 0.053(3) Uani 0.50 1 d P B 2
H27A H 0.2970 0.3164 0.2981 0.063 Uiso 0.50 1 calc PR B 2
C3 C 0.48340(17) 0.08982(16) 0.21592(11) 0.0283(3) Uani 1 1 d . . .
H3A H 0.5231 0.1658 0.2017 0.034 Uiso 1 1 calc R B .
H3B H 0.3917 0.1230 0.2080 0.034 Uiso 1 1 calc R . .
N3 N 0.56456(13) -0.00346(13) 0.15998(9) 0.0259(3) Uani 1 1 d . B .
C31 C 0.60027(18) 0.06082(18) 0.06345(11) 0.0313(4) Uani 1 1 d . . .
H31A H 0.5181 0.1054 0.0427 0.038 Uiso 1 1 calc R B .
H31B H 0.6525 -0.0075 0.0300 0.038 Uiso 1 1 calc R . .
C32 C 0.67978(17) 0.16017(18) 0.04484(11) 0.0304(4) Uani 1 1 d . B .
C33 C 0.61741(19) 0.29255(19) 0.04147(13) 0.0377(4) Uani 1 1 d . . .
H33 H 0.5241 0.3214 0.0481 0.045 Uiso 1 1 calc R B .
C34 C 0.6904(2) 0.3827(2) 0.02856(14) 0.0436(5) Uani 1 1 d . B .
H34 H 0.6469 0.4727 0.0274 0.052 Uiso 1 1 calc R . .
C35 C 0.8263(2) 0.3418(2) 0.01742(13) 0.0428(5) Uani 1 1 d . . .
H35 H 0.8762 0.4037 0.0085 0.051 Uiso 1 1 calc R B .
C36 C 0.8899(2) 0.2112(2) 0.01918(14) 0.0424(5) Uani 1 1 d . B .
H36 H 0.9835 0.1832 0.0113 0.051 Uiso 1 1 calc R . .
C37 C 0.81679(19) 0.1208(2) 0.03246(13) 0.0382(4) Uani 1 1 d . . .
H37 H 0.8609 0.0310 0.0331 0.046 Uiso 1 1 calc R B .
N4 N 0.69686(15) -0.23972(16) 0.37934(11) 0.0353(3) Uani 1 1 d . . .
C41 C 0.71344(19) -0.32542(19) 0.43833(13) 0.0362(4) Uani 1 1 d . . .
C42 C 0.7355(3) -0.4372(2) 0.51255(15) 0.0562(6) Uani 1 1 d . . .
H42A H 0.7344 -0.5175 0.4990 0.084 Uiso 1 1 calc R . .
H42B H 0.6651 -0.4223 0.5658 0.084 Uiso 1 1 calc R . .
H42C H 0.8218 -0.4475 0.5229 0.084 Uiso 1 1 calc R . .
N5 N 0.79771(15) -0.01581(16) 0.24745(10) 0.0355(3) Uani 1 1 d . . .
C51 C 0.8720(2) 0.0386(2) 0.24395(13) 0.0392(4) Uani 1 1 d . . .
C52 C 0.9705(3) 0.1071(3) 0.23774(19) 0.0657(7) Uani 1 1 d . . .
H52A H 1.0581 0.0454 0.2335 0.099 Uiso 1 1 calc R . .
H52B H 0.9462 0.1412 0.2907 0.099 Uiso 1 1 calc R . .
H52C H 0.9734 0.1806 0.1848 0.099 Uiso 1 1 calc R . .
N6 N 0.79278(14) -0.26201(16) 0.19677(10) 0.0333(3) Uani 1 1 d . . .
C61 C 0.83915(18) -0.36186(19) 0.17923(12) 0.0342(4) Uani 1 1 d . . .
C62 C 0.8976(3) -0.4900(2) 0.15930(16) 0.0567(6) Uani 1 1 d . . .
H62A H 0.8539 -0.5556 0.2056 0.085 Uiso 1 1 calc R . .
H62B H 0.9925 -0.5148 0.1571 0.085 Uiso 1 1 calc R . .
H62C H 0.8858 -0.4864 0.1017 0.085 Uiso 1 1 calc R . .
B1 B 0.2377(2) 0.2697(2) 0.05280(14) 0.0329(4) Uani 1 1 d . . .
F1 F 0.32890(12) 0.29296(13) -0.02883(8) 0.0502(3) Uani 1 1 d . . .
F2 F 0.26127(14) 0.32278(14) 0.11017(8) 0.0566(3) Uani 1 1 d . . .
F3 F 0.25239(13) 0.13424(12) 0.08700(10) 0.0583(3) Uani 1 1 d . . .
F4 F 0.11070(11) 0.32822(13) 0.04186(9) 0.0522(3) Uani 1 1 d . . .
B2 B 0.3435(3) -0.3232(3) 0.60533(17) 0.0465(6) Uani 1 1 d . . .
F5 F 0.2684(5) -0.4136(5) 0.6449(3) 0.0976(17) Uani 0.756(6) 1 d P C 1
F6 F 0.4397(3) -0.3568(2) 0.6515(2) 0.0806(11) Uani 0.756(6) 1 d P C 1
F7 F 0.4049(4) -0.3361(4) 0.52110(16) 0.1127(14) Uani 0.756(6) 1 d P C 1
F8 F 0.2724(5) -0.2006(4) 0.6061(4) 0.145(2) Uani 0.756(6) 1 d P C 1
F5A F 0.2887(15) -0.4269(11) 0.6282(11) 0.090(5) Uani 0.244(6) 1 d P C 2
F6A F 0.4587(12) -0.310(2) 0.5691(13) 0.232(11) Uani 0.244(6) 1 d P C 2
F7A F 0.2798(18) -0.2478(18) 0.5387(10) 0.178(9) Uani 0.244(6) 1 d P C 2
F8A F 0.289(2) -0.259(2) 0.6656(11) 0.199(11) Uani 0.244(6) 1 d P C 2
 
loop_
 _atom_site_aniso_label
 _atom_site_aniso_U_11
 _atom_site_aniso_U_22
 _atom_site_aniso_U_33
 _atom_site_aniso_U_23
 _atom_site_aniso_U_13
 _atom_site_aniso_U_12
Ni 0.02372(11) 0.02414(12) 0.03373(12) -0.00499(9) -0.01092(8) -0.00469(8)
C1 0.0263(8) 0.0240(8) 0.0310(8) -0.0058(7) -0.0100(6) -0.0062(6)
N1 0.0240(6) 0.0213(7) 0.0305(7) -0.0044(5) -0.0087(5) -0.0049(5)
C11 0.0282(8) 0.0217(8) 0.0392(9) -0.0021(7) -0.0108(7) -0.0073(7)
C12 0.0342(9) 0.0281(9) 0.0331(9) 0.0003(7) -0.0139(7) -0.0126(7)
C13 0.0325(9) 0.0305(10) 0.0442(10) -0.0024(8) -0.0135(8) -0.0098(7)
C14 0.0333(10) 0.0490(13) 0.0691(15) -0.0037(11) -0.0184(10) -0.0118(9)
C15 0.0509(14) 0.091(2) 0.0752(17) -0.0029(15) -0.0343(13) -0.0313(14)
C16 0.083(2) 0.123(3) 0.0519(14) -0.0150(15) -0.0290(14) -0.0560(19)
C17 0.0560(13) 0.0814(18) 0.0417(11) -0.0180(11) -0.0061(10) -0.0380(13)
C2 0.0247(8) 0.0267(9) 0.0321(8) -0.0062(7) -0.0082(6) -0.0052(6)
N2 0.0289(7) 0.0225(7) 0.0302(7) -0.0059(6) -0.0099(6) -0.0046(6)
C21 0.0394(10) 0.0313(10) 0.0338(9) -0.0106(7) -0.0134(8) -0.0054(8)
C22 0.024(3) 0.017(8) 0.033(4) -0.012(5) -0.008(3) 0.004(4)
C23 0.056(4) 0.029(5) 0.030(5) -0.003(3) -0.003(4) -0.006(3)
C24 0.039(5) 0.056(9) 0.072(8) -0.035(8) 0.001(5) -0.004(5)
C25 0.037(5) 0.063(7) 0.072(7) -0.042(6) -0.016(6) 0.015(5)
C26 0.065(7) 0.041(5) 0.065(7) -0.022(4) -0.027(6) 0.009(4)
C27 0.041(4) 0.020(3) 0.034(5) -0.003(3) -0.008(3) 0.002(3)
C22A 0.051(8) 0.019(8) 0.043(4) -0.014(5) -0.021(4) 0.005(5)
C23A 0.054(5) 0.031(5) 0.030(5) -0.004(3) 0.008(4) -0.012(4)
C24A 0.047(5) 0.065(8) 0.094(9) -0.043(6) 0.010(5) -0.015(5)
C25A 0.047(5) 0.102(17) 0.095(11) -0.066(12) -0.012(8) 0.000(8)
C26A 0.053(8) 0.078(10) 0.063(9) -0.034(7) -0.028(7) 0.031(7)
C27A 0.065(6) 0.050(7) 0.031(5) -0.008(4) 0.001(4) -0.012(4)
C3 0.0304(8) 0.0222(8) 0.0309(8) -0.0044(7) -0.0108(7) -0.0032(6)
N3 0.0261(7) 0.0227(7) 0.0293(7) -0.0056(6) -0.0078(5) -0.0060(5)
C31 0.0340(9) 0.0299(9) 0.0297(8) -0.0036(7) -0.0088(7) -0.0102(7)
C32 0.0331(9) 0.0285(9) 0.0286(8) -0.0012(7) -0.0091(7) -0.0103(7)
C33 0.0351(9) 0.0307(10) 0.0430(10) -0.0008(8) -0.0117(8) -0.0082(8)
C34 0.0505(12) 0.0306(10) 0.0478(11) -0.0052(9) -0.0113(9) -0.0121(9)
C35 0.0496(12) 0.0458(12) 0.0398(10) -0.0057(9) -0.0105(9) -0.0259(10)
C36 0.0334(9) 0.0485(12) 0.0455(11) -0.0057(9) -0.0090(8) -0.0160(9)
C37 0.0327(9) 0.0352(10) 0.0422(10) -0.0079(8) -0.0055(8) -0.0073(8)
N4 0.0336(8) 0.0320(8) 0.0421(9) -0.0061(7) -0.0157(7) -0.0068(6)
C41 0.0386(10) 0.0323(10) 0.0389(10) -0.0069(8) -0.0162(8) -0.0049(8)
C42 0.0830(17) 0.0375(12) 0.0442(12) 0.0006(9) -0.0312(12) -0.0037(11)
N5 0.0351(8) 0.0330(8) 0.0410(8) -0.0054(7) -0.0146(7) -0.0099(7)
C51 0.0393(10) 0.0368(11) 0.0452(11) -0.0043(8) -0.0154(8) -0.0143(9)
C52 0.0642(16) 0.0678(17) 0.0819(18) -0.0030(14) -0.0275(14) -0.0436(14)
N6 0.0251(7) 0.0344(9) 0.0415(8) -0.0086(7) -0.0120(6) -0.0055(6)
C61 0.0326(9) 0.0339(10) 0.0334(9) -0.0052(8) -0.0110(7) -0.0041(8)
C62 0.0773(17) 0.0358(12) 0.0485(12) -0.0174(10) -0.0134(11) 0.0031(11)
B1 0.0288(9) 0.0296(10) 0.0380(10) -0.0074(8) -0.0103(8) -0.0027(8)
F1 0.0443(7) 0.0517(8) 0.0451(6) -0.0137(6) 0.0007(5) -0.0086(6)
F2 0.0741(9) 0.0584(8) 0.0481(7) -0.0120(6) -0.0278(6) -0.0178(7)
F3 0.0561(8) 0.0298(7) 0.0749(9) -0.0053(6) -0.0099(7) -0.0049(6)
F4 0.0294(6) 0.0520(8) 0.0730(8) -0.0152(6) -0.0202(6) 0.0012(5)
B2 0.0424(12) 0.0460(14) 0.0463(13) -0.0076(11) -0.0078(10) -0.0109(11)
F5 0.087(2) 0.118(4) 0.0764(19) 0.028(2) -0.0143(16) -0.066(3)
F6 0.089(2) 0.0722(16) 0.103(2) -0.0143(13) -0.0559(18) -0.0229(13)
F7 0.121(3) 0.177(4) 0.0437(13) -0.0252(16) 0.0025(14) -0.064(3)
F8 0.142(4) 0.059(2) 0.224(6) -0.048(3) -0.084(4) 0.042(2)
F5A 0.101(8) 0.036(5) 0.176(13) -0.047(7) -0.092(9) 0.007(5)
F6A 0.094(8) 0.47(3) 0.225(18) -0.25(2) 0.095(10) -0.160(13)
F7A 0.201(15) 0.198(14) 0.138(10) 0.138(10) -0.119(11) -0.152(13)
F8A 0.27(2) 0.227(19) 0.157(12) -0.164(14) 0.095(13) -0.161(18)
 
_geom_special_details
;
 All esds (except the esd in the dihedral angle between two l.s. planes)
 are estimated using the full covariance matrix.  The cell esds are taken
 into account individually in the estimation of esds in distances, angles
 and torsion angles; correlations between esds in cell parameters are only
 used when they are defined by crystal symmetry.  An approximate (isotropic)
 treatment of cell esds is used for estimating esds involving l.s. planes.
;
 
loop_
 _geom_bond_atom_site_label_1
 _geom_bond_atom_site_label_2
 _geom_bond_distance
 _geom_bond_site_symmetry_2
 _geom_bond_publ_flag
Ni N5 2.0204(15) . ?
Ni N4 2.0284(16) . ?
Ni N6 2.0309(16) . ?
Ni N1 2.1320(13) . ?
Ni N2 2.1378(14) . ?
Ni N3 2.1467(14) . ?
C1 N1 1.473(2) . ?
C1 N3 1.480(2) . ?
N1 C2 1.473(2) . ?
N1 C11 1.480(2) . ?
C11 C12 1.515(2) . ?
C12 C17 1.376(3) . ?
C12 C13 1.386(3) . ?
C13 C14 1.382(3) . ?
C14 C15 1.356(4) . ?
C15 C16 1.378(4) . ?
C16 C17 1.392(3) . ?
C2 N2 1.473(2) . ?
N2 C3 1.470(2) . ?
N2 C21 1.488(2) . ?
C21 C22A 1.40(2) . ?
C21 C22 1.59(2) . ?
C22 C23 1.31(3) . ?
C22 C27 1.38(3) . ?
C23 C24 1.439(19) . ?
C24 C25 1.353(18) . ?
C25 C26 1.376(17) . ?
C26 C27 1.38(3) . ?
C22A C27A 1.42(3) . ?
C22A C23A 1.45(3) . ?
C23A C24A 1.35(2) . ?
C24A C25A 1.357(16) . ?
C25A C26A 1.367(19) . ?
C26A C27A 1.39(3) . ?
C3 N3 1.476(2) . ?
N3 C31 1.490(2) . ?
C31 C32 1.503(2) . ?
C32 C37 1.389(3) . ?
C32 C33 1.390(3) . ?
C33 C34 1.387(3) . ?
C34 C35 1.380(3) . ?
C35 C36 1.379(3) . ?
C36 C37 1.388(3) . ?
N4 C41 1.133(2) . ?
C41 C42 1.450(3) . ?
N5 C51 1.130(2) . ?
C51 C52 1.461(3) . ?
N6 C61 1.140(2) . ?
C61 C62 1.445(3) . ?
B1 F2 1.375(2) . ?
B1 F4 1.380(2) . ?
B1 F1 1.391(2) . ?
B1 F3 1.391(2) . ?
B2 F6A 1.242(9) . ?
B2 F8A 1.275(10) . ?
B2 F8 1.329(4) . ?
B2 F5A 1.346(11) . ?
B2 F7 1.358(3) . ?
B2 F5 1.358(4) . ?
B2 F6 1.382(3) . ?
B2 F7A 1.386(9) . ?
 
loop_
 _geom_angle_atom_site_label_1
 _geom_angle_atom_site_label_2
 _geom_angle_atom_site_label_3
 _geom_angle
 _geom_angle_site_symmetry_1
 _geom_angle_site_symmetry_3
 _geom_angle_publ_flag
N5 Ni N4 93.84(6) . . ?
N5 Ni N6 99.52(6) . . ?
N4 Ni N6 91.07(6) . . ?
N5 Ni N1 163.96(6) . . ?
N4 Ni N1 95.39(6) . . ?
N6 Ni N1 93.40(6) . . ?
N5 Ni N2 100.19(6) . . ?
N4 Ni N2 98.97(6) . . ?
N6 Ni N2 157.17(6) . . ?
N1 Ni N2 65.41(5) . . ?
N5 Ni N3 102.81(6) . . ?
N4 Ni N3 158.74(6) . . ?
N6 Ni N3 98.98(6) . . ?
N1 Ni N3 65.51(5) . . ?
N2 Ni N3 65.39(5) . . ?
N1 C1 N3 103.24(12) . . ?
C1 N1 C2 109.86(13) . . ?
C1 N1 C11 114.66(13) . . ?
C2 N1 C11 114.77(13) . . ?
C1 N1 Ni 91.83(9) . . ?
C2 N1 Ni 91.61(9) . . ?
C11 N1 Ni 130.31(10) . . ?
N1 C11 C12 113.13(14) . . ?
C17 C12 C13 118.50(18) . . ?
C17 C12 C11 120.39(18) . . ?
C13 C12 C11 121.06(16) . . ?
C14 C13 C12 120.94(19) . . ?
C15 C14 C13 120.1(2) . . ?
C14 C15 C16 120.2(2) . . ?
C15 C16 C17 119.9(2) . . ?
C12 C17 C16 120.4(2) . . ?
N2 C2 N1 103.09(12) . . ?
C3 N2 C2 109.58(13) . . ?
C3 N2 C21 114.28(13) . . ?
C2 N2 C21 113.45(13) . . ?
C3 N2 Ni 91.79(9) . . ?
C2 N2 Ni 91.40(9) . . ?
C21 N2 Ni 132.66(11) . . ?
C22A C21 N2 111.7(11) . . ?
C22A C21 C22 7.5(19) . . ?
N2 C21 C22 113.1(9) . . ?
C23 C22 C27 122.9(17) . . ?
C23 C22 C21 119.7(17) . . ?
C27 C22 C21 116.5(15) . . ?
C22 C23 C24 120.2(13) . . ?
C25 C24 C23 117.5(12) . . ?
C24 C25 C26 120.9(13) . . ?
C25 C26 C27 121.3(12) . . ?
C22 C27 C26 117.0(12) . . ?
C21 C22A C27A 125(2) . . ?
C21 C22A C23A 123.7(19) . . ?
C27A C22A C23A 111.5(17) . . ?
C24A C23A C22A 121.7(13) . . ?
C23A C24A C25A 123.6(16) . . ?
C24A C25A C26A 119.1(16) . . ?
C25A C26A C27A 118.1(13) . . ?
C26A C27A C22A 125.5(14) . . ?
N2 C3 N3 103.54(13) . . ?
C3 N3 C1 109.20(13) . . ?
C3 N3 C31 113.73(13) . . ?
C1 N3 C31 110.91(12) . . ?
C3 N3 Ni 91.30(9) . . ?
C1 N3 Ni 91.06(9) . . ?
C31 N3 Ni 136.96(11) . . ?
N3 C31 C32 111.56(14) . . ?
C37 C32 C33 118.80(17) . . ?
C37 C32 C31 120.49(17) . . ?
C33 C32 C31 120.70(16) . . ?
C34 C33 C32 120.49(18) . . ?
C35 C34 C33 120.0(2) . . ?
C36 C35 C34 120.18(18) . . ?
C35 C36 C37 119.84(19) . . ?
C36 C37 C32 120.65(19) . . ?
C41 N4 Ni 166.05(16) . . ?
N4 C41 C42 178.7(2) . . ?
C51 N5 Ni 176.40(16) . . ?
N5 C51 C52 178.5(3) . . ?
C61 N6 Ni 160.28(15) . . ?
N6 C61 C62 178.6(2) . . ?
F2 B1 F4 109.51(17) . . ?
F2 B1 F1 109.12(16) . . ?
F4 B1 F1 109.44(16) . . ?
F2 B1 F3 109.44(16) . . ?
F4 B1 F3 110.07(16) . . ?
F1 B1 F3 109.25(16) . . ?
F6A B2 F8A 110.3(10) . . ?
F6A B2 F8 103.8(11) . . ?
F8A B2 F8 46.1(11) . . ?
F6A B2 F5A 132.3(11) . . ?
F8A B2 F5A 108.2(9) . . ?
F8 B2 F5A 123.2(7) . . ?
F6A B2 F7 58.0(7) . . ?
F8A B2 F7 154.4(9) . . ?
F8 B2 F7 111.2(4) . . ?
F5A B2 F7 94.5(7) . . ?
F6A B2 F5 143.7(11) . . ?
F8A B2 F5 94.1(7) . . ?
F8 B2 F5 112.4(4) . . ?
F5A B2 F5 14.1(8) . . ?
F7 B2 F5 107.9(3) . . ?
F6A B2 F6 56.8(10) . . ?
F8A B2 F6 76.5(12) . . ?
F8 B2 F6 110.2(3) . . ?
F5A B2 F6 107.9(6) . . ?
F7 B2 F6 108.2(3) . . ?
F5 B2 F6 106.7(3) . . ?
F6A B2 F7A 101.1(12) . . ?
F8A B2 F7A 102.7(14) . . ?
F8 B2 F7A 58.8(9) . . ?
F5A B2 F7A 96.8(8) . . ?
F7 B2 F7A 61.8(9) . . ?
F5 B2 F7A 99.0(5) . . ?
F6 B2 F7A 154.3(5) . . ?
 
_diffrn_measured_fraction_theta_max    0.991
_diffrn_reflns_theta_full              29.60
_diffrn_measured_fraction_theta_full   0.991
_refine_diff_density_max    0.408
_refine_diff_density_min   -0.566
_refine_diff_density_rms    0.055
